# Supplementary material for: Dimethyl fumarate reduces TNF and Plasmodium falciparum induced brain endothelium activation in vitro
Source: PubMed Central journal article supplement (PMC7579885; doi:10.1186/s12936-020-03447-7), 2020-10-21

A

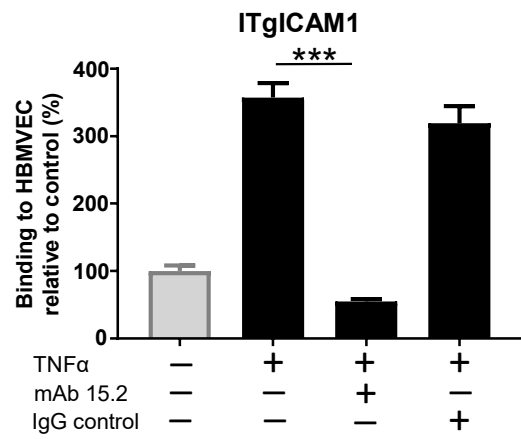

B

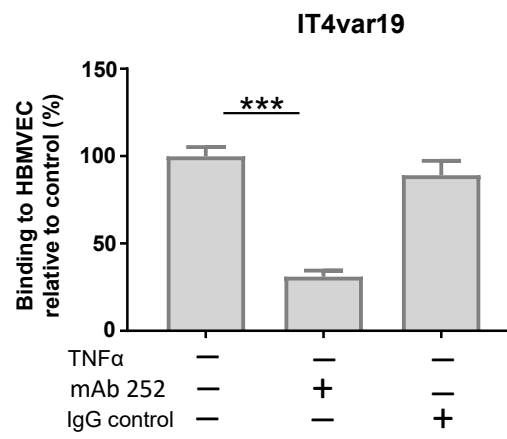

Supplement: 12936_2020_3447_MOESM5_ESM.pdf [file 12936_2020_3447_MOESM5_ESM.pdf]
